# Supplementary material for: Genetic identification and diversity of stocks of the African bonytongue, Heterotis niloticus (Osteoglossiformes: Arapaiminae), in Nigeria, West Africa
Source: Sci Rep. 2022 May 19;12:8417. doi: 10.1038/s41598-022-12428-6 (PMC9120501; doi:10.1038/s41598-022-12428-6)
Supplement: Supplementary file 1 — Supplementary Information 1. [file 41598_2022_12428_MOESM1_ESM.xlsx]

## Sheet: All_data
[Dataset 1. Complete genotypes of H. niloticus individuals examined in this study]
Sample_ID	Population	Hn5		Hn11		Hn 14		Hn28		Hn 30		Hn32		Hn45		Hn47		Hn54
1	Kainji_Lake	271	279	272	288	268	270	247	249	130	150	118	118	327	327	307	311	167	169
2	Kainji_Lake	275	275	278	284	270	272	247	247	154	162	116	122	327	327	307	309	167	173
3	Kainji_Lake	271	273	278	292	280	282	257	259	150	150	118	134	319	327	309	311	167	167
4	Kainji_Lake	265	287	278	292	264	270	249	255	150	156	118	118	319	327	307	311	167	173
5	Kainji_Lake	265	273	290	292	270	278	247	259	150	154	118	122	319	319	311	313	167	167
6	Kainji_Lake	271	273	282	290	270	282	257	259	150	154	118	122	319	327	309	313	167	167
7	Kainji_Lake	0	0	278	286	0	0	247	259	0	0	118	118	0	0	309	311	167	167
8	Kainji_Lake	265	265	272	290	264	268	247	259	150	152	118	118	319	319	309	311	167	167
9	Kainji_Lake	271	275	272	278	268	272	257	257	142	150	118	118	327	327	309	311	167	169
10	Kainji_Lake	271	273	290	290	270	280	249	251	150	152	118	122	319	327	305	305	163	165
11	Kainji_Lake	271	273	290	292	280	282	247	249	150	154	118	134	319	319	309	311	167	167
12	Kainji_Lake	271	271	290	290	264	280	249	251	166	166	118	118	319	327	305	305	163	165
13	Kainji_Lake	271	281	278	282	278	280	247	259	150	154	118	134	327	327	309	311	167	167
14	Kainji_Lake	279	283	292	298	276	280	249	257	148	150	116	118	327	327	309	311	167	167
15	Kainji_Lake	269	271	284	286	278	278	249	259	150	154	118	120	327	327	311	313	163	165
16	Kainji_Lake	271	275	286	292	266	272	249	249	136	140	118	118	327	327	309	311	167	167
17	Kainji_Lake	265	271	280	296	268	270	243	259	154	160	120	134	319	327	307	309	163	167
18	Kainji_Lake	265	273	284	298	270	272	243	247	146	154	118	118	319	319	307	309	167	167
19	Kainji_Lake	271	275	0	0	270	288	0	0	142	150	0	0	327	327	0	0	0	0
20	Kainji_Lake	265	273	276	292	280	282	247	259	150	152	118	122	319	327	309	311	167	167
21	Kainji_Lake	273	273	288	290	270	272	247	249	152	160	118	118	319	327	309	309	167	167
22	Kainji_Lake	273	279	290	298	264	282	247	253	130	138	118	118	327	327	307	317	167	167
23	Kainji_Lake	265	271	290	294	270	286	247	259	146	148	118	118	319	327	307	309	167	167
24	Kainji_Lake	271	275	270	276	270	272	257	257	142	150	118	118	327	331	309	311	167	169
25	Kainji_Lake	275	275	278	282	260	266	247	247	154	162	118	118	327	327	307	309	167	169
41	Epe_Lagoon	271	271	276	284	268	270	251	251	130	144	120	122	327	327	309	309	165	165
42	Epe_Lagoon	271	271	276	284	272	286	251	251	124	132	120	120	327	327	309	309	165	167
43	Epe_Lagoon	271	271	276	284	272	286	251	251	122	130	120	120	327	327	309	309	165	167
44	Epe_Lagoon	271	271	284	292	266	270	251	251	122	124	120	122	327	327	309	309	163	165
45	Epe_Lagoon	271	271	276	276	268	268	251	251	144	152	118	120	327	327	309	311	167	167
46	Epe_Lagoon	271	271	282	284	274	274	247	249	146	148	118	122	327	327	301	305	167	167
47	Epe_Lagoon	271	271	276	284	272	286	251	251	122	132	118	120	327	327	309	309	165	167
48	Epe_Lagoon	271	271	276	276	274	274	251	251	122	144	118	120	327	327	309	309	165	165
49	Epe_Lagoon	271	293	284	284	274	274	247	251	136	144	118	122	327	327	309	309	165	167
50	Epe_Lagoon	271	293	284	284	272	274	247	251	122	122	120	120	327	327	309	309	167	167
51	Epe_Lagoon	271	271	290	294	266	270	249	251	124	142	122	122	327	327	309	309	163	165
52	Epe_Lagoon	271	271	276	284	270	274	251	251	136	146	118	118	327	327	309	311	165	167
53	Epe_Lagoon	271	271	284	284	266	274	251	251	144	148	118	118	327	327	309	309	165	167
54	Epe_Lagoon	271	271	284	284	270	274	251	251	124	148	120	120	327	327	309	309	165	167
55	Epe_Lagoon	271	271	284	284	270	270	251	251	144	144	118	120	327	327	309	309	163	167
56	Epe_Lagoon	265	271	284	284	270	270	243	249	124	148	118	120	327	327	309	309	165	167
57	Epe_Lagoon	271	271	284	284	270	274	251	251	124	156	116	122	327	327	309	315	165	167
58	Epe_Lagoon	271	273	284	294	270	288	251	251	124	124	122	122	327	327	309	309	161	165
59	Epe_Lagoon	271	271	276	276	274	274	251	251	124	144	118	120	327	327	309	309	165	165
60	Epe_Lagoon	271	271	284	292	268	272	251	251	122	124	118	122	327	327	309	309	165	167
26	Igbokoda	271	273	284	284	270	292	251	251	148	148	122	122	327	327	307	309	165	165
27	Igbokoda	267	291	280	294	266	292	251	251	142	148	118	122	327	327	307	309	167	167
28	Igbokoda	271	271	284	284	266	294	245	251	124	152	110	118	321	321	309	309	165	165
29	Igbokoda	271	271	284	284	266	272	247	251	124	130	118	122	327	327	309	309	165	167
30	Igbokoda	271	271	284	284	278	292	251	251	124	148	118	122	327	327	309	309	165	165
31	Igbokoda	271	271	276	276	274	292	251	251	130	132	118	118	327	327	309	309	165	167
32	Igbokoda	271	271	284	284	292	292	251	251	132	132	118	118	321	327	309	309	165	165
33	Igbokoda	271	271	284	284	266	274	251	253	124	144	118	122	327	327	309	309	167	167
34	Igbokoda	271	271	284	284	264	274	251	251	124	124	118	118	327	327	309	309	165	167
35	Igbokoda	265	271	284	298	274	292	247	251	138	148	116	118	327	327	309	311	165	167
36	Igbokoda	271	273	284	284	292	292	233	245	124	148	118	118	327	327	311	311	167	167
37	Igbokoda	271	271	294	294	266	266	251	251	132	136	118	120	327	327	307	309	165	167
38	Igbokoda	271	271	284	286	274	274	249	251	124	148	118	122	327	327	311	317	163	165
39	Igbokoda	267	293	284	284	274	274	243	243	142	148	118	120	327	327	309	309	165	165
40	Igbokoda	271	293	276	292	266	274	247	251	124	138	118	122	327	327	307	311	165	167
81	Benin	0	0	276	284	0	0	243	251	0	0	118	122	0	0	309	309	165	165
82	Benin	271	273	284	284	268	272	247	251	144	144	118	122	327	327	309	309	165	167
83	Benin	271	295	276	284	272	286	243	251	136	160	118	118	327	327	309	309	165	169
84	Benin	0	0	276	292	0	0	251	251	0	0	118	118	327	327	309	309	167	169
85	Benin	0	0	284	292	0	0	247	251	0	0	118	122	0	0	309	309	165	165
86	Benin	289	291	284	292	270	276	243	247	144	144	118	122	327	327	309	309	165	165
87	Benin	0	0	276	284	0	0	243	249	0	0	118	122	0	0	309	309	165	165
88	Benin	291	291	276	282	276	278	243	247	144	144	120	122	327	327	309	309	165	165
89	Benin	271	291	284	292	270	272	247	247	144	150	118	118	327	327	309	309	165	165
90	Benin	271	291	284	292	270	278	247	251	136	168	118	120	319	327	309	309	165	165
61	Ethiope_River	271	273	284	284	268	274	251	251	124	130	118	118	327	327	309	309	165	165
62	Ethiope_River	267	271	284	284	266	268	247	251	124	152	118	118	327	327	309	309	165	165
63	Ethiope_River	265	271	284	296	262	266	251	251	136	144	118	118	327	327	307	307	167	167
64	Ethiope_River	271	271	284	284	266	272	247	251	122	148	118	118	327	327	309	309	167	167
65	Ethiope_River	271	271	276	284	272	274	243	251	124	124	116	118	327	327	307	309	163	165
66	Ethiope_River	265	265	284	284	272	272	243	251	124	130	118	118	327	327	309	309	165	167
67	Ethiope_River	271	271	284	284	266	276	247	249	124	154	118	118	327	327	307	309	165	165
68	Ethiope_River	271	271	278	288	272	292	247	251	124	138	118	122	327	327	309	309	165	165
69	Ethiope_River	271	273	284	284	266	274	243	251	124	154	118	122	327	327	309	309	165	167
70	Ethiope_River	265	271	284	284	266	274	251	253	130	156	118	122	327	327	309	309	165	167
71	Ethiope_River	265	293	284	284	268	294	247	247	138	154	118	122	327	327	309	309	165	167
72	Ethiope_River	265	271	276	284	274	274	247	253	124	124	118	122	327	327	309	309	165	165
73	Ethiope_River	271	271	278	284	272	272	247	251	124	124	116	118	327	327	309	309	165	165
74	Ethiope_River	271	271	284	284	266	294	251	251	122	144	116	118	327	327	309	309	165	167
75	Ethiope_River	271	273	276	284	274	276	243	253	154	154	118	118	327	327	309	315	167	167
76	Ethiope_River	271	273	276	284	266	292	251	253	130	144	118	122	327	327	309	309	165	167
77	Ethiope_River	273	293	276	284	274	274	243	251	124	154	118	118	327	327	309	315	165	165
78	Ethiope_River	265	271	284	284	274	296	251	251	124	144	118	118	327	327	309	309	165	165
79	Ethiope_River	265	271	284	284	272	274	247	251	124	148	118	122	327	327	309	309	163	165
80	Ethiope_River	0	0	284	294	0	0	243	249	0	0	118	118	0	0	309	309	165	167
